# Supplementary material for: Coumestrol mitigates retinal cell inflammation, apoptosis, and oxidative stress in a rat model of diabetic retinopathy via activation of SIRT1
Source: PubMed Central journal article supplement (PMC7950241; doi:10.18632/aging.202467), 2021-02-01
Supplement: aging-13-202467-s001.pdf [file aging-13-202467-s001.pdf]

## SUPPLEMENTARY TABLE

**Supplementary Table 1. Primer sequences for RT-qPCR.**

| <b>Gene</b>          | <b>Primer sequence</b>                                                  |
|----------------------|-------------------------------------------------------------------------|
| Rat $\beta$ -actin   | F: 5'-TCCTCCTGAGCGCAAGTACTCT-3'<br>R: 5'-GCTCAGTAACAGTCCGCCTAGAA-3'     |
| Rat SIRT1            | F: 5'-CGCCTTATCCTCTAGTTCCTGTG-3'<br>R: 5'-CGGTCTGTCAGCATCATCTTCC-3'     |
| Rat iNOS             | F: 5'-ATTCAGATCCCGAAACGC-3'<br>R: 5'-CCAGAACCTCCAGGCACA-3'              |
| Human $\beta$ -actin | F: 5'-TGCTCGACAACGGCTCCGGCATGT-3'<br>R: 5'-CCAGCCAGGTCCAGACGCAGGAT-3'   |
| Human SIRT1          | F: 5'-GAAAATGCTGGCCTAATAGACTTG-3'<br>R: 5'-TGGTACAAACAAGTATTGATTACCG-3' |
| Human iNOS           | F: 5'-TCACGACACCCTTCACCACAA-3'<br>R: 5'-CCATCCTCCTGCCCACTTCCTC-3'       |

Notes: RT-qPCR, reverse transcription-quantitative polymerase chain reaction; SIRT1, sirtuin 1; iNOS, inducible nitric oxide synthase; F, forward; R, reverse.
